# Supplementary material for: Structural, electrochemical and photophysical investigations of Re(i)-complexes of κ3N-tridentate heterocyclic ligands
Source: Royal Society of Chemistry journal article supplement (doi:10.1039/c4dt01454e), 2014-06-26
Supplement: c4dt01454e1.pdf [file c4dt01454e1.pdf]

## **Structural, electrochemical and photophysical investigations of Re(I)-complexes of $\kappa^3N$ -tridentate heterocyclic ligands**

**Amlan K. Pal and Garry S. Hanan\***

*Département de Chimie, Université de Montréal, 2900 Edouard-Montpetit, Montréal, Québec H3T-1J4, Canada*

### **Supporting Information**

## Materials, methods and instrumentation

Nuclear magnetic resonance (NMR) spectra were recorded in CD<sub>3</sub>CN, CDCl<sub>3</sub>, and DMSO-d<sub>6</sub> at room temperature (r.t.) on a Bruker AV400 (400 MHz) spectrometer for <sup>1</sup>H NMR and at 100 for <sup>13</sup>C NMR, respectively. Chemical shifts are reported in part per million (ppm) relative to residual solvent protons (1.94 ppm for CD<sub>3</sub>CN, 7.26 ppm for CDCl<sub>3</sub>, 2.50 ppm for DMSO-d<sub>6</sub>) and the carbon resonance (1.24 ppm for CD<sub>3</sub>CN, 77.00 ppm for CDCl<sub>3</sub>, 39.43 ppm for DMSO-d<sub>6</sub>) of the solvent.

All the photophysical measurements were carried out in deaerated acetonitrile at r.t. in septa-sealed quartz cells. Absorption spectra were measured on a Cary 500i UV-Vis-NIR Spectrophotometer. For luminescence spectra a Cary Eclipse Fluorescence spectrofluorimeter was used. Electrochemical measurements were carried out in argon-purged purified acetonitrile at room temperature with a BAS CV50W multipurpose potentiostat. The working electrode was a glassy carbon electrode. The counter electrode was a Pt wire, and the pseudo-reference electrode was a silver wire. The reference was set using an internal 1 mM ferrocene/ferrocinium sample at 395 mV vs. SCE in acetonitrile. The concentration of the compounds was about 1 mM. Tetrabutylammonium hexafluorophosphate (TBAP) was used as supporting electrolyte and its concentration was 0.10 M. Cyclic voltammograms of **L1**, **L2**, **1** and **2** were obtained at scan rates of 50, 50, 10 and 25 mVs<sup>-1</sup>, respectively. The criteria for reversibility were the separation of 60 mV between cathodic and anodic peaks, the close to unity ratio of the intensities of the cathodic and anodic currents, and the constancy of the peak potential on changing scan rate. Differential pulse voltammetry was conducted with a sweep rate of 20 mVs<sup>-1</sup> and a pulse amplitude, width and period of 50 mV, 50 ms and 200 ms, respectively.

Experimental uncertainties are as follows: absorption maxima,  $\pm 2$  nm; molar absorption coefficient, 10%; redox potentials,  $\pm 10$  mV, emission maxima,  $\pm 2$  nm.

1,3,4,6,7,8-Hexahydro-2H-pyrimido[1,2-(a)]pyrimidine (**H-hpp**), 2,6-dibromopyridine, 2,6-dichloropyrazine, ( $\pm$ ) BINAP, *t*-BuOK were purchased from Aldrich and used as received.  $\text{Re}_2(\text{CO})_{10}$ ,  $\text{Pd}(\text{OAc})_2$  were purchased from Pressure Chemicals. Ligand **L1** was synthesized using literature procedure.<sup>1</sup>

#### Synthesis of **L2**:

( $\pm$ ) BINAP (0.09 mmol, 60 mg) was placed in an oven-dried, nitrogen-purged round-bottomed flask that was sealed with a septum. Dry toluene (3 mL) was added via syringe. The resulting suspension was heated at 90 °C for 2 min to dissolve the BINAP. This was cooled to room temperature and  $\text{Pd}(\text{OAc})_2$  (0.06 mmol, 14 mg) was added and stirred for 3 min. To the resulting bright yellow solution, 2,6-dichloropyrazine (3.2 mmol, 479 mg) and 1,3,4,6,7,8-hexahydro-2H-pyrimido[1,2-*a*]pyrimidine (6.9 mmol, 962 mg) were added. Stirring for 5 min at ambient temperature resulted in a pale orange slurry to which was added *t*-BuOK (9.0 mmol, 1.01 g). The reaction mixture was then stirred at 90 °C for 16 h, was cooled to room temperature and diethyl ether (60 mL) was added and the mixture was filtered. Evaporation of the filtrate followed by purification by column chromatography on deactivated alumina using 3:2 (DCM:MeOH, v/v) afforded the ligand (**L2**) as crystalline pale yellow solid. Yield = 736 mg (65 %). <sup>1</sup>H NMR (DMSO-*d*<sub>6</sub>, 400 MHz); 8.38 (s, 2 H), 3.70 (t, *J*<sup>t</sup> = 6 Hz, 4 H), 3.25 (t, *J*<sup>t</sup> = 6 Hz, 4 H), 3.19 (t, *J*<sup>t</sup> = 6 Hz, 4 H), 3.15 (t, *J*<sup>t</sup> = 6 Hz, 4 H), 1.94 (quint., *J*<sup>qt</sup> = 6 Hz, 4 H), 1.77 (quint., *J*<sup>qt</sup> = 6 Hz, 4 H) ppm. <sup>13</sup>C NMR (DMSO-*d*<sub>6</sub>, 100 MHz); 149.6, 147.9, 130.7, 47.9, 47.6, 43.1, 42.5, 22.8, 22.1 ppm. HRMS (ESI), *m/z*: 355.23526 [*M*+*H*]<sup>+</sup> ( $\text{C}_{18}\text{H}_{27}\text{N}_8$  requires 355.23532;  $\Delta$ ppm -0.17),

178.12134 [M+2H]<sup>2+</sup> (C<sub>18</sub>H<sub>28</sub>N<sub>8</sub> requires 178.12130; Δppm 0.23). Anal. Calc. for C<sub>18</sub>H<sub>26</sub>N<sub>8</sub>: C, 60.99; H, 7.39; N, 31.61. Found: C, 60.99; H, 7.42; N, 31.58.

*[Re(L1)(CO)<sub>3</sub>][Br]* (**1**):

Re(CO)<sub>5</sub>Br (50 mg, 0.123 mmol) was dissolved in hot dry toluene (30 mL) under a N<sub>2</sub> atmosphere. After cooling to ambient temperature, **L1** (48 mg, 0.136 mmol) was added to the resulting colourless solution. The suspension was heated at 80 °C for 3 h under a N<sub>2</sub> atmosphere in the dark. A colourless precipitate was observed upon completion of the reaction. The precipitate was isolated by filtration, washed with toluene (3x40 mL) and dried under vacuum to afford complex **1** as a pale yellow solid. Crystals suitable for X-ray crystallography were grown by diffusion of diethyl ether into a concentrated solution of **1** in chloroform:acetone (1:3, v/v). Yield = 80 mg (93%). <sup>1</sup>H NMR (CDCl<sub>3</sub>, 400 MHz); 8.12 (t, J<sup>t</sup> = 8 Hz, 1 H), 7.34 (d, J<sup>d</sup> = 8 Hz, 2 H), 4.10 (d, J<sup>d</sup> = 12 Hz, 2 H), 3.64 (m, 4 H), 3.52 (m, 2 H), 3.44 (m, 4 H), 3.37 (m, 2 H), 2.47 (m, 2 H), 2.32 (m, 2 H), 2.01 (m, 4 H), 1.65 (d, J<sup>d</sup> = 12 Hz, 2 H). <sup>13</sup>C NMR (CDCl<sub>3</sub>, 100 MHz); 196.1, 154.2, 153.1, 143.4, 110.7, 51.6, 48.7, 46.5, 22.4, 21.6 ppm (one of the six different methylene carbons could not be seen), <sup>13</sup>C NMR (CD<sub>3</sub>CN, 100 MHz); 197.4, 155.3, 154.3, 143.4, 111.0, 52.3, 49.3, 49.2, 47.1, 22.7, 22.2 ppm (although one of the methylene carbons could not be seen in CDCl<sub>3</sub> solvent, it could be seen when recorded in CD<sub>3</sub>CN). HRMS (ESI), m/z: 624.17347 [M-Br]<sup>+</sup> (C<sub>22</sub>H<sub>27</sub>N<sub>7</sub>O<sub>3</sub><sup>187</sup>Re requires 624.17274; Δppm 1.17). Anal. Calc. for C<sub>22</sub>H<sub>27</sub>N<sub>7</sub>O<sub>3</sub>ReBr: C, 37.55; H, 3.87; N, 13.93. Found: C, 37.54; H, 3.78; N, 13.82.

*[Re(L2)(CO)<sub>3</sub>][Br]* (**2**):

Re(CO)<sub>5</sub>Br (50 mg, 0.123 mmol) was dissolved in hot dry toluene (30 mL) under a N<sub>2</sub> atmosphere. After cooling to ambient temperature, **L2** (48 mg, 0.135 mmol) was added to the

resulting colourless solution. The suspension was heated at 80 °C for 6 h under a N<sub>2</sub> atmosphere in the dark. An olive-green precipitate was observed upon completion of the reaction time. The precipitate was isolated by filtration, washed with toluene (2x10 mL) and Et<sub>2</sub>O (2x10 mL) and dried under vacuum to afford complex **2** as a olive-green solid. Long needle shaped crystals suitable for X-ray crytallography could be grown by diffusion of diethyl ether into a concentrated solution of **2** in dichloromethane. Yield = 78 mg (91%). <sup>1</sup>H NMR (CD<sub>3</sub>CN, 400 MHz); 8.42 (s, 2 H), 4.13 (dt, J<sup>dt</sup> = 14, 4 Hz, 2 H), 3.67 (m, 4 H), 3.41 (m, 8 H), 3.28 (ddd, J<sup>ddd</sup> = 12, 10, 6 Hz, 2 H), 2.25 (m, 4 H), 1.98 (d, J<sup>d</sup> = 6 Hz, 2 H) 1.90 (m, 2H). <sup>13</sup>C NMR (CD<sub>3</sub>CN, 100 MHz); 197.2, 154.4, 150.4, 132.8, 53.2, 49.9, 49.8, 47.3, 23.4, 22.3 ppm. HRMS (ESI), m/z: 625.16817 [M-Br]<sup>+</sup> (C<sub>21</sub>H<sub>26</sub>N<sub>8</sub>O<sub>3</sub><sup>187</sup>Re requires 625.16799; Δppm 0.29). Anal. Calc. for C<sub>21</sub>H<sub>26</sub>N<sub>8</sub>O<sub>3</sub>ReBr: C, 35.80; H, 3.72; N, 15.90. Found: C, 35.81; H, 3.69; N, 15.77.

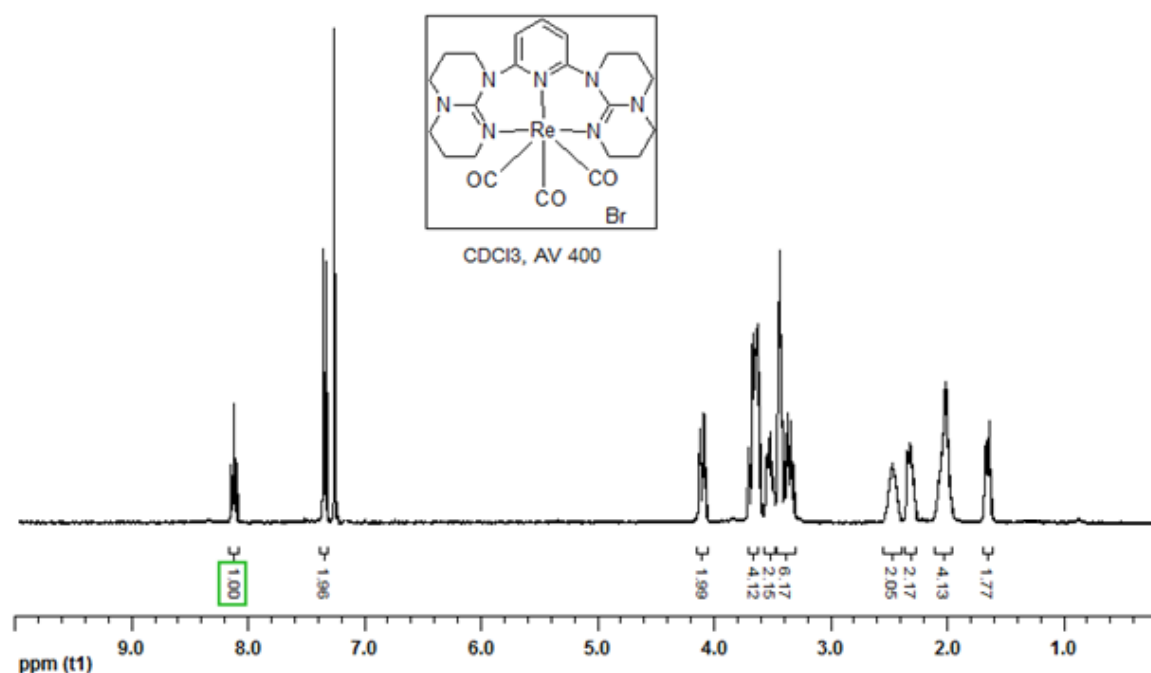

**Figure S1.** <sup>1</sup>H NMR spectrum of **1** in CDCl<sub>3</sub> at 400 MHz at room temperature.

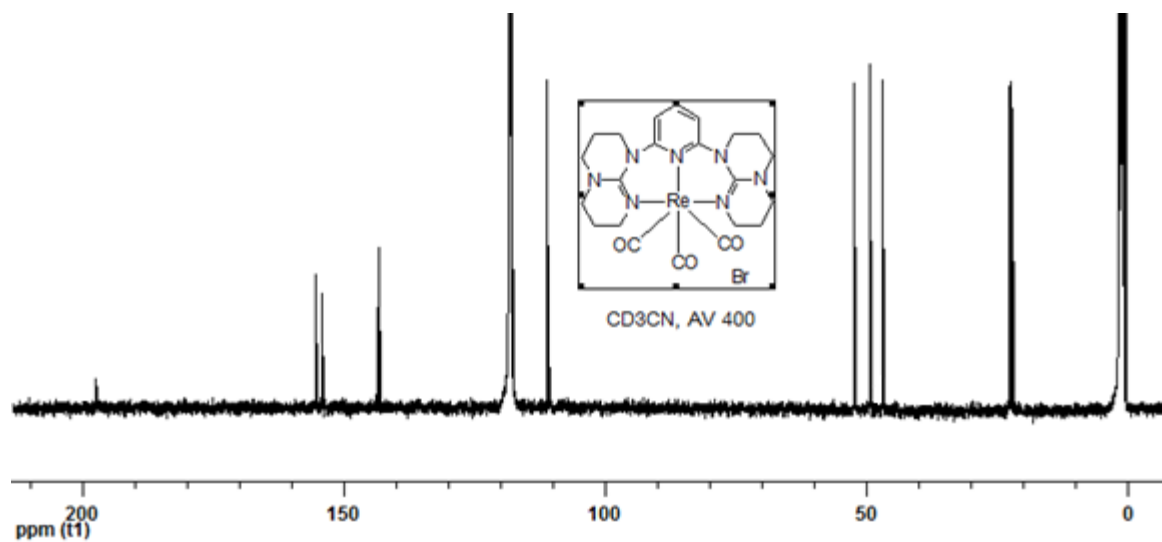

**Figure S2.**  $^{13}\text{C}$  NMR spectrum of **1** in  $\text{CD}_3\text{CN}$  at 400 MHz at room temperature.

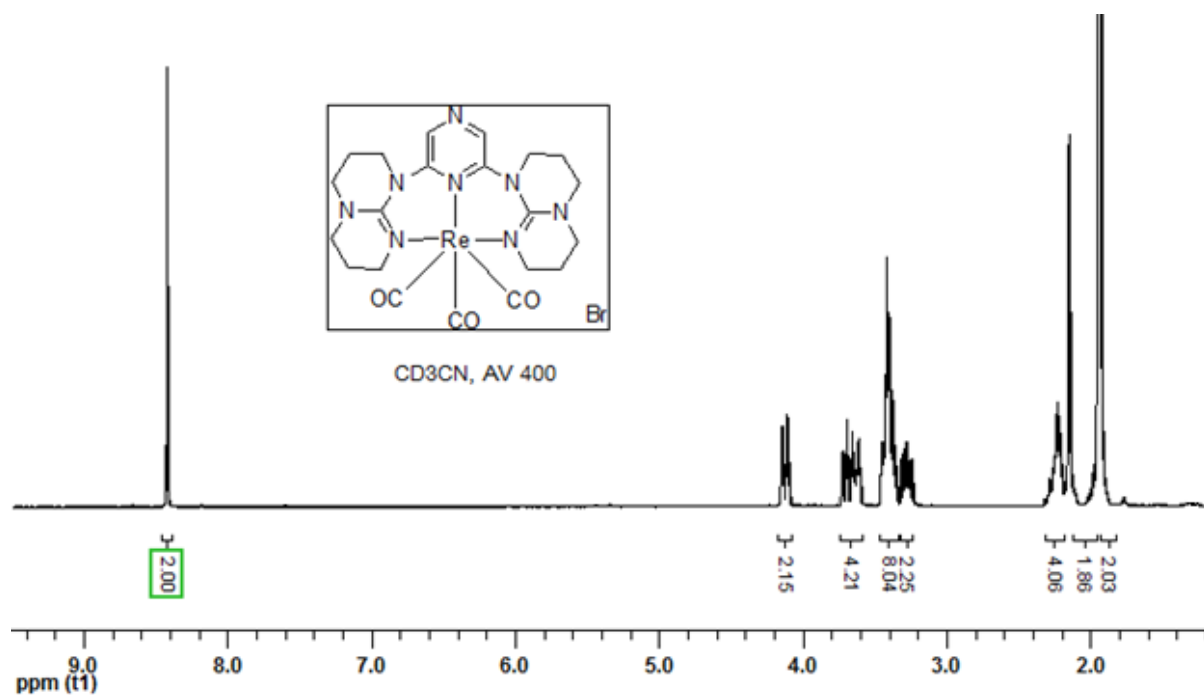

**Figure S3.**  $^1\text{H}$  NMR spectrum of **2** in  $\text{CD}_3\text{CN}$  at 400 MHz at room temperature.

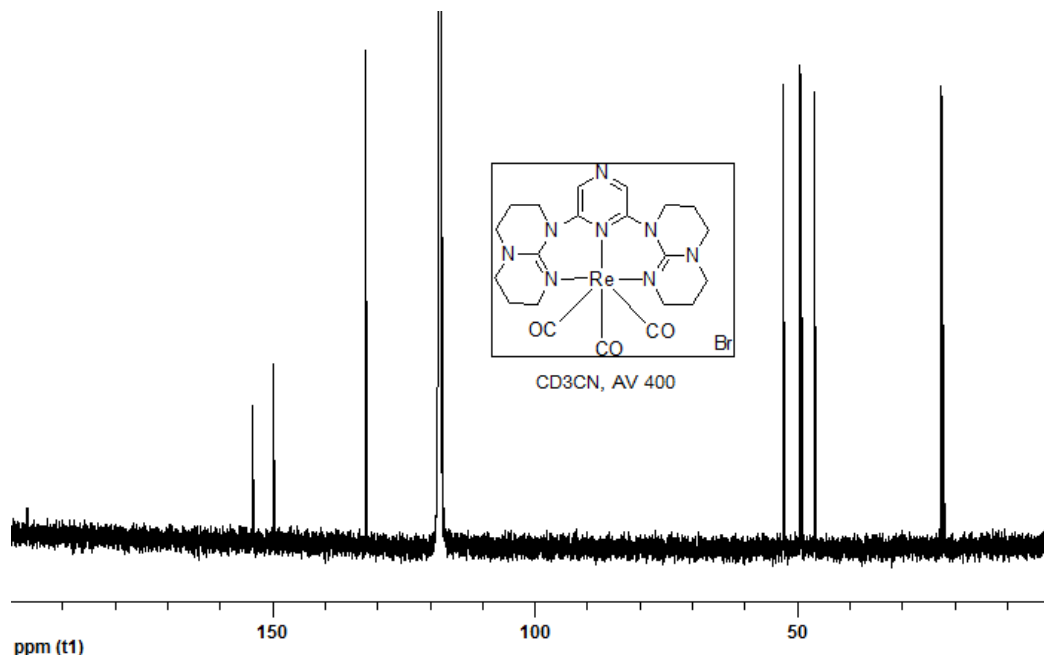

**Figure S4.**  $^{13}\text{C}$  NMR spectrum of **2** in  $\text{CD}_3\text{CN}$  at 400 MHz at room temperature.

#### **X-ray diffraction studies:**

Diffraction data were collected on a Bruker SMART 6000 with Montel 200 monochromator, equipped with a rotating anode source for  $\text{Cu K}\alpha$  radiation. The diffraction quality of the crystals were checked, revealing in some cases poor diffraction with a large amount of diffuse scattering, signaling extensive crystal disorder. Cell refinement and data reduction were done using APEX2.<sup>2</sup> Absorption corrections were applied using SADABS.<sup>3</sup> Structures were solved by direct methods using SHELXS97 and refined on  $F^2$  by full-matrix least squares using SHELXL97.<sup>4</sup> All non-hydrogen atoms were refined anisotropically. Hydrogen atoms were refined isotropic on calculated positions using a riding model. For compound **1** the highest difference peak is 0.93 Å far from Re-atom and the deepest hole is 0.73 Å from Re-atom. In addition, in **1** four more peaks with density around  $1 \text{ e}/\text{Å}^3$  were present essentially due to the quality of the crystal employed, which was the best available. For compound **2** the highest difference peak is 1.01 Å far from

atom C9 and is believed due to positional disorder of this atom. This disorder was not taken into account for modelling. Except this Q-peak, four other Q-peaks of electron density ranging from 2.25-1.16 e/Å<sup>3</sup> were located and they are in close proximity (1.37-1.05 Å) to the Re-atom.

**Table S1.** Crystallographic data for complexes **1** and **2**.

| Compound                                                           | 1                                                                      | 2                                                                      |
|--------------------------------------------------------------------|------------------------------------------------------------------------|------------------------------------------------------------------------|
| CCDC Number                                                        | 922649                                                                 | 975057                                                                 |
| Formula                                                            | [C <sub>22</sub> H <sub>27</sub> N <sub>7</sub> O <sub>3</sub> Re][Br] | [C <sub>21</sub> H <sub>26</sub> N <sub>8</sub> O <sub>3</sub> Re][Br] |
| <i>Mw</i> (g/mol); <i>d</i> <sub>calcd.</sub> (g/cm <sup>3</sup> ) | 703.62; 1.981                                                          | 704.61; 2.002                                                          |
| <i>T</i> (K); F(000)                                               | 150(2); 684                                                            | 150(2); 684                                                            |
| Crystal System                                                     | Triclinic                                                              | Triclinic                                                              |
| Space Group                                                        | P-1                                                                    | P-1                                                                    |
| Unit Cell:                                                         |                                                                        |                                                                        |
| <i>a</i> (Å)                                                       | 8.1289(3)                                                              | 8.2315(6)                                                              |
| <i>b</i> (Å)                                                       | 11.6833(5)                                                             | 11.7681(6)                                                             |
| <i>c</i> (Å)                                                       | 13.8021(6)                                                             | 13.3936(8)                                                             |
| <i>α</i> (°)                                                       | 105.115(2)                                                             | 104.882(3)                                                             |
| <i>β</i> (°)                                                       | 105.785(2)                                                             | 105.407(3)                                                             |
| <i>γ</i> (°)                                                       | 99.199(1)                                                              | 99.732(3)                                                              |
| <i>V</i> (Å <sup>3</sup> ); <i>Z</i>                               | 1179.57(8); 2                                                          | 1168.99(13); 2                                                         |
| <i>θ</i> range (°); completeness                                   | 3.51-69.18; 0.981                                                      | 3.61-69.34; 0.984                                                      |
| R <sub>file</sub> :collec./indep.; R <sub>int</sub>                | 70414/4350; 0.0490                                                     | 45519/4333; 0.0536                                                     |
| <i>μ</i> (mm <sup>-1</sup> )                                       | 12.397                                                                 | 12.524                                                                 |
| R1(F); wR(F <sup>2</sup> ); GoF(F <sup>2</sup> ) <sup>a</sup>      | 0.0271; 0.0709; 1.104                                                  | 0.0337; 0.0907; 1.082                                                  |
| Residual electron density                                          | 1.528; -0.935                                                          | 2.646; -1.040                                                          |

<sup>a</sup>R1(F) based on observed reflections with I>4σ(I) for **1** and **2**; wR(F<sup>2</sup>) and GoF(F<sup>2</sup>) based on all data for all compounds.



**Table S2.** Comparison of bond distances and angles in **1** and **2**.

| Compound | Bond Length |                 |                | Angle     |                 |                |
|----------|-------------|-----------------|----------------|-----------|-----------------|----------------|
|          |             | Obs.<br>(X-ray) | Calc.<br>(DFT) |           | Obs.<br>(X-ray) | Calc.<br>(DFT) |
| <b>1</b> | Re1-N1      | 2.175(3)        | 2.21295        | N1-Re1-N4 | 78.14(11)       | 78.048         |
|          | Re1-N4      | 2.199(3)        | 2.24161        | N1-Re1-N7 | 78.75(11)       | 78.049         |
|          | Re1-N7      | 2.183(3)        | 2.24161        | N4-Re1-N7 | 88.41(11)       | 89.895         |
|          | Re1-C21     | 1.901(5)        | 1.92552        |           |                 |                |
|          | Re1-C20     | 1.922(4)        | 1.92647        |           |                 |                |
|          | Re1-C22     | 1.933(4)        | 1.92647        |           |                 |                |
|          | O2-C21      | 1.170(6)        | 1.16266        |           |                 |                |
|          | O1-C20      | 1.144(6)        | 1.16305        |           |                 |                |
|          | O3-C22      | 1.153(5)        | 1.16305        |           |                 |                |
|          | <b>2</b>    | Re1-N1          | 2.163(4)       | 2.19737   | N1-Re1-N5       | 77.95(15)      |
| Re1-N8   |             | 2.194(4)        | 2.24680        | N1-Re1-N8 | 78.61(14)       | 78.298         |
| Re1-N5   |             | 2.195(4)        | 2.25059        | N5-Re1-N8 | 89.05(15)       | 91.413         |
| Re1-C19  |             | 1.934(6)        | 1.92749        |           |                 |                |
| Re1-C20  |             | 1.931(5)        | 1.92935        |           |                 |                |
| Re1-C21  |             | 1.900(6)        | 1.92698        |           |                 |                |
| O1-C19   |             | 1.135(7)        | 1.16226        |           |                 |                |
| O2-C20   |             | 1.140(7)        | 1.16149        |           |                 |                |
| O3-C21   |             | 1.184(7)        | 1.16254        |           |                 |                |

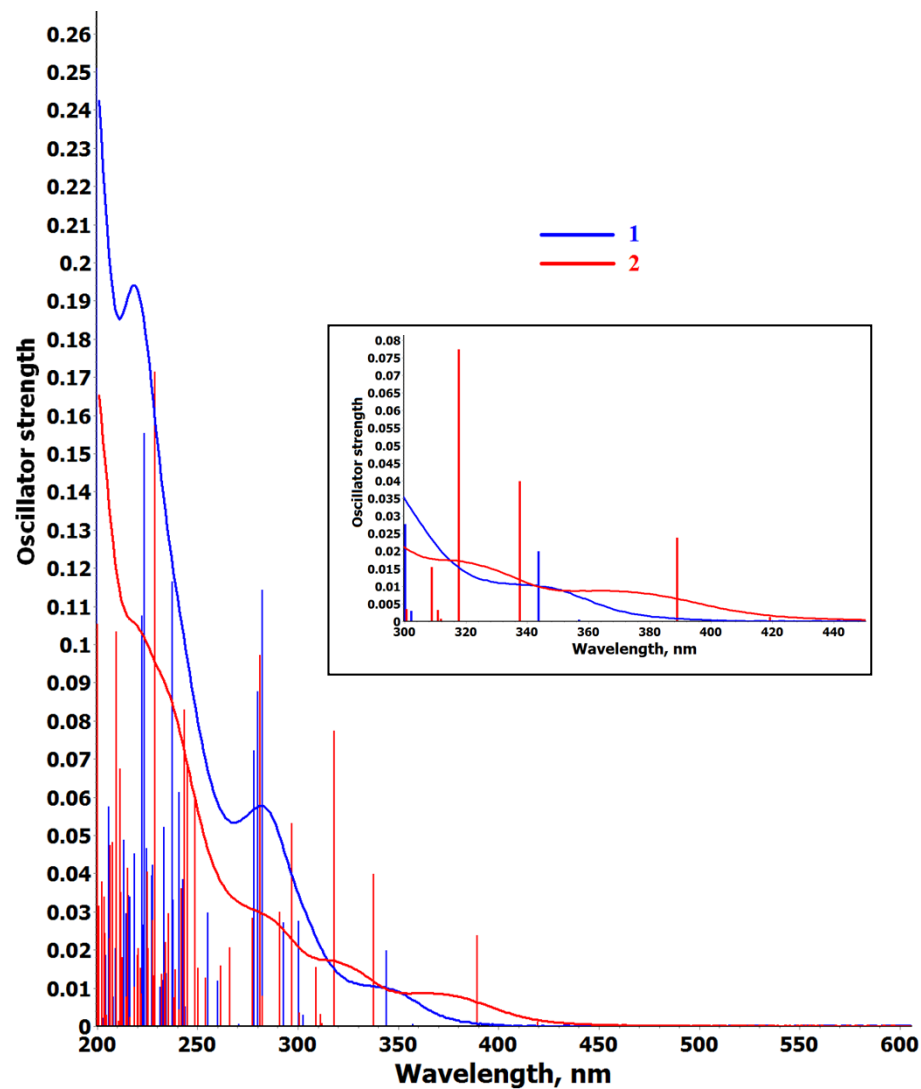

**Figure S5.** Overlay of experimental (curved lines) absorption spectra and calculated (straight lines) oscillator strengths at different wavelengths of **1** (blue) and **2** (red), at ambient temperature in dry acetonitrile.

**Table S3.** UV-vis and emission data of **L1**, **L2**, **1** and **2**.

| Compound                                  | UV-vis <sup>a</sup>                                                                       |            |           |           | Emission <sup>a</sup><br>$\lambda_{\text{max}}$ , nm | Lifetime <sup>a</sup><br>(ns) |
|-------------------------------------------|-------------------------------------------------------------------------------------------|------------|-----------|-----------|------------------------------------------------------|-------------------------------|
|                                           | $\lambda_{\text{max}}$ , nm ( $\epsilon \times 10^3$ , M <sup>-1</sup> cm <sup>-1</sup> ) |            |           |           |                                                      |                               |
| <b>L1 (dgpj)</b>                          | 228 (29.0)                                                                                | 311 (12.8) | -----     | -----     | 360                                                  |                               |
| <b>L2 (dgpz)</b>                          | 224 (26.9)                                                                                | 340 (14.1) | -----     | -----     | 382                                                  |                               |
| <b>1</b>                                  | 218 (64.7)                                                                                | 282 (19.2) | 346 (3.5) | -----     | 381                                                  | 9.3                           |
| <b>2</b>                                  | 219 (44.5)                                                                                | 283 (12.4) | 318 (7.3) | 377 (3.4) | 418                                                  | 11.6                          |
| Re(bpy)(py)(CO) <sub>3</sub> <sup>b</sup> |                                                                                           |            |           | 366 (2.4) | 558                                                  | 658                           |

<sup>a</sup>data in dry deaerated acetonitrile. <sup>b</sup>from ref 6.

## DFT Calculations:

### Computational details:

All calculations were performed with the Gaussian03<sup>7</sup> suite of programs employing the DFT method, the Becke three-parameter hybrid functional,<sup>8</sup> and Lee-Yang-Parr's gradient-corrected correlation functional (B3LYP).<sup>9</sup> Singlet ground state geometry optimizations for **1**<sup>1+</sup>, **2**<sup>1+</sup> and **1**<sup>2+</sup> were carried out at the (R)B3LYP and (U)B3LYP levels, respectively, in the gas phase, using their respective crystallographic structures as starting points. All elements except Re were assigned the 6-31G(d,p) basis set.<sup>10</sup> The double- $\zeta$  quality LANL2DZ ECP basis set<sup>11</sup> with an effective core potential and one additional f-type polarization was employed for the Re-atom. Vertical electronic excitations based on (R)B3LYP- and (U)B3LYP-optimized geometries were computed for **1**<sup>1+</sup>, **2**<sup>1+</sup> and **1**<sup>2+</sup>, respectively, using the TD-DFT formalism<sup>12a,b</sup> in acetonitrile using conductor-like polarizable continuum model (CPCM).<sup>13a-c</sup> Vibrational frequency calculations were performed to ensure that the optimized geometries represent the local minima and there are only positive eigenvalues. The electronic distribution and localization of the singlet excited states were visualized using the electron density difference maps (ED-DMs).<sup>14</sup> *Gausssum 2.2* and *Chemission* were employed to visualize the absorption spectra (simulated with Gaussian distribution with a full-width at half maximum (fwhm) set to 3000 cm<sup>-1</sup>) and to calculate the fractional contributions of various groups to each molecular orbital. All calculated structures and Kohn-Sham orbitals were visualized with ChemCraft.<sup>15</sup>

**Table S4.** MO Composition of  $1^{1+}$  in Singlet ( $S=0$ ) Ground State (b3lyp/LanL2DZ(f)[Re]6-31G\*\*[C,H,N,O]).

| MO          | Energy (eV)  | Composition |           |           |                  |                   |
|-------------|--------------|-------------|-----------|-----------|------------------|-------------------|
|             |              | Re          | Py        | Hpp       | CO (trans to Py) | CO (trans to Hpp) |
| LUMO+5      | -0.04        | 8           | 3         | 69        | 1                | 19                |
| LUMO+4      | -0.12        | 0           | 2         | 3         | 25               | 70                |
| LUMO+3      | -0.87        | 22          | 9         | 8         | 17               | 43                |
| LUMO+2      | -0.91        | 22          | 16        | 5         | 22               | 36                |
| LUMO+1      | -1.05        | 2           | 75        | 18        | 2                | 3                 |
| <b>LUMO</b> | <b>-1.70</b> | <b>6</b>    | <b>75</b> | <b>8</b>  | <b>9</b>         | <b>2</b>          |
| <b>HOMO</b> | <b>-5.97</b> | <b>34</b>   | <b>0</b>  | <b>48</b> | <b>1</b>         | <b>17</b>         |
| HOMO-1      | -6.14        | 22          | 14        | 55        | 6                | 5                 |
| HOMO-2      | -6.62        | 61          | 5         | 4         | 13               | 17                |
| HOMO-3      | -6.78        | 6           | 31        | 59        | 1                | 2                 |
| HOMO-4      | -7.05        | 40          | 3         | 40        | 9                | 8                 |
| HOMO-5      | -7.30        | 23          | 5         | 61        | 0                | 10                |

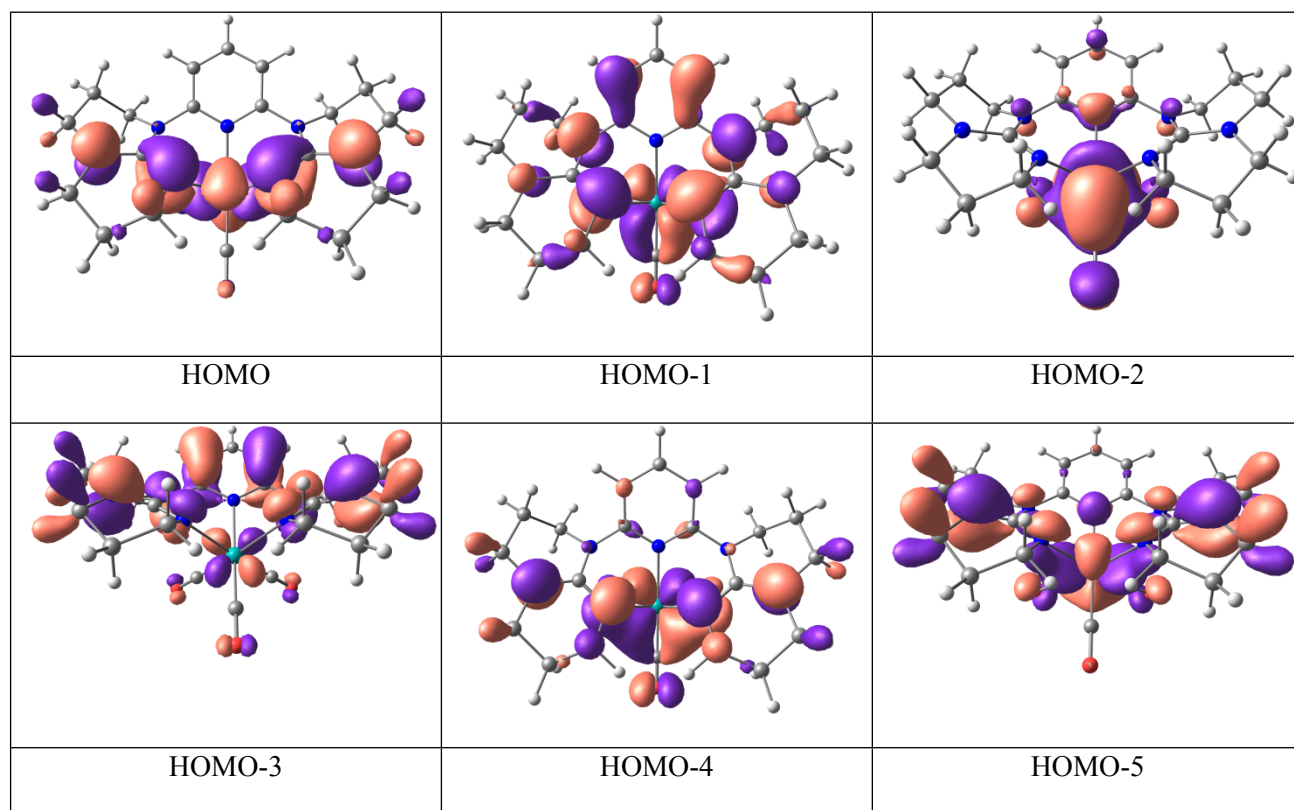

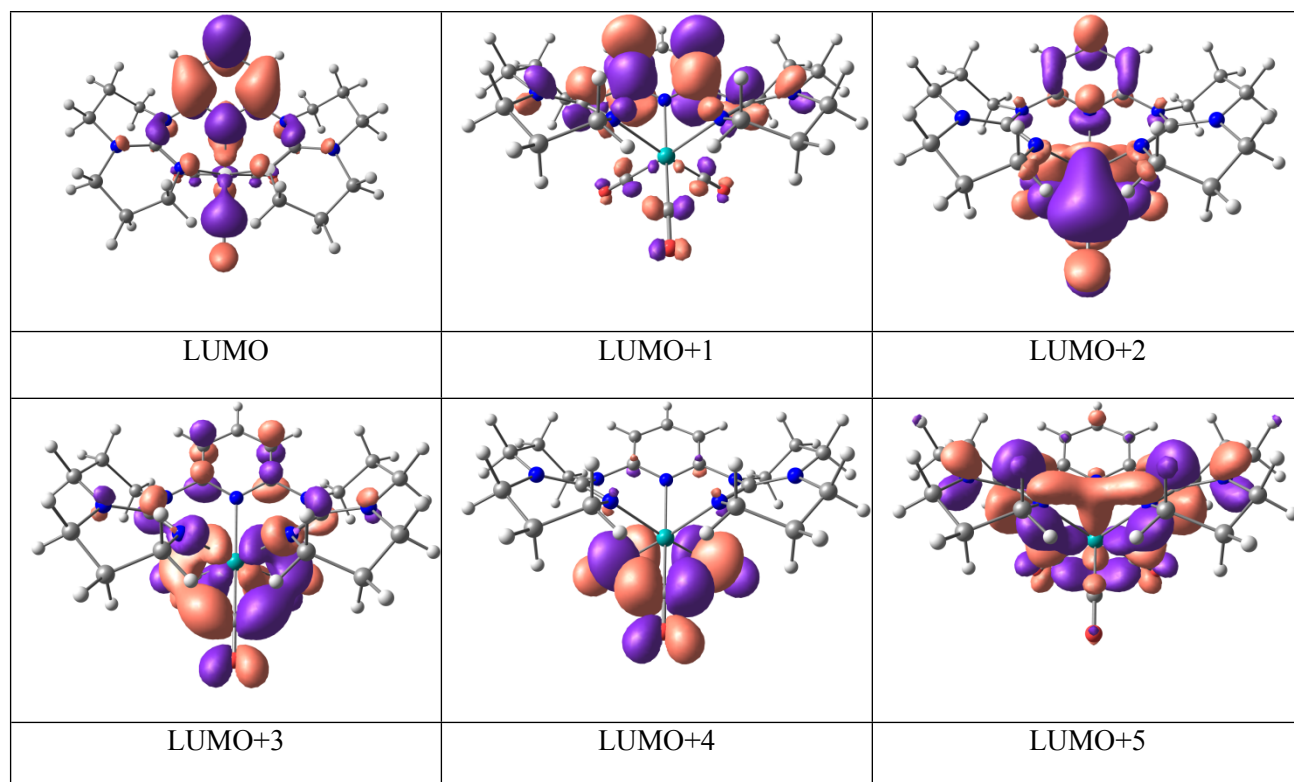

**Figure S6.** Kohn-Sham molecular orbital diagrams of  $\mathbf{1}^{1+}$  in ( $S=0$ ) ground state

**Table S5.** Selected Transitions from TD-DFT calculations of  $\mathbf{1}^{1+}$  in the Singlet Ground State (b3lyp/LanL2DZ(f)[Re]6-31G\*\*[C,H,N,O], CPCM ( $\text{CH}_3\text{CN}$ )).

| energy (eV) | $\lambda/\text{nm}$ | $\lambda/\text{nm}$ ( $\epsilon \times 10^3 \text{ M}^{-1} \text{ cm}^{-1}$ ) [expt.] | f      | Major transition(s)                                                                       | character                                                                                                                                        |
|-------------|---------------------|---------------------------------------------------------------------------------------|--------|-------------------------------------------------------------------------------------------|--------------------------------------------------------------------------------------------------------------------------------------------------|
| 5.55        | 223                 | 218 (64.7)                                                                            | 0.1553 | H-5 $\rightarrow$ L+1 (33%),<br>H-1 $\rightarrow$ L+7 (26%),<br>H $\rightarrow$ L+6 (16%) | [hpp(n/ $\pi$ ) (major) +<br>Re(d $\pi$ ) (minor) to<br>Py( $\pi^*$ )] + [hpp(n/ $\pi$ )<br>(major) + Re(d $\pi$ )<br>(minor) to hpp( $\pi^*$ )] |
| 4.39        | 282                 | 282 (19.2)                                                                            | 0.1143 | H-3 $\rightarrow$ L (75%),<br>H $\rightarrow$ L+3 (10%)                                   | hpp(n/ $\pi$ ) (major) +<br>Py( $\pi$ ) (minor) to Py( $\pi^*$ )                                                                                 |
| 3.61        | 343                 | 346 (3.5)                                                                             | 0.0199 | H-1 $\rightarrow$ L (94%)                                                                 | hpp(n/ $\pi$ ) (major) +<br>Re(d $\pi$ ) (minor) to<br>Py( $\pi^*$ )                                                                             |

**Table S6.** MO composition of  $\mathbf{1}^{2+}$  in ( $S=1$ ) ground state in  $\alpha$ -spin (ub3lyp/LanL2DZ(f)[Re]6-31G\*\*[C,H,N,O]).

| MO          | Energy (eV)  | Composition |           |           |                  |                   |
|-------------|--------------|-------------|-----------|-----------|------------------|-------------------|
|             |              | Re          | Py        | Hpp       | CO (trans to Py) | CO (trans to Hpp) |
| LUMO+5      | -1.06        | 1           | 8         | 3         | 15               | 73                |
| LUMO+4      | -1.37        | 17          | 3         | 22        | 1                | 57                |
| LUMO+3      | -1.55        | 4           | 59        | 10        | 4                | 23                |
| LUMO+2      | -1.64        | 14          | 16        | 19        | 13               | 38                |
| LUMO+1      | -1.79        | 17          | 25        | 7         | 9                | 42                |
| <b>LUMO</b> | <b>-2.24</b> | <b>10</b>   | <b>63</b> | <b>7</b>  | <b>14</b>        | <b>7</b>          |
| <b>HOMO</b> | <b>-6.84</b> | <b>30</b>   | <b>0</b>  | <b>56</b> | <b>0</b>         | <b>13</b>         |
| HOMO-1      | -6.94        | 16          | 27        | 52        | 3                | 2                 |
| HOMO-2      | -7.51        | 15          | 22        | 56        | 3                | 4                 |
| HOMO-3      | -7.66        | 59          | 10        | 8         | 11               | 13                |
| HOMO-4      | -8.14        | 9           | 8         | 79        | 0                | 3                 |
| HOMO-5      | -8.18        | 39          | 4         | 44        | 7                | 5                 |

**Table S7.** MO composition of  $\mathbf{1}^{2+}$  in ( $S=1$ ) ground state in  $\beta$ -spin (ub3lyp/LanL2DZ(f)[Re]6-31G\*\*[C,H,N,O]).

| MO          | Energy (eV)  | Composition |           |           |                  |                   |
|-------------|--------------|-------------|-----------|-----------|------------------|-------------------|
|             |              | Re          | Py        | Hpp       | CO (trans to Py) | CO (trans to Hpp) |
| LUMO+5      | -1.10        | 16          | 2         | 39        | 0                | 43                |
| LUMO+4      | -1.44        | 14          | 22        | 5         | 21               | 38                |
| LUMO+3      | -1.57        | 4           | 57        | 22        | 6                | 12                |
| LUMO+2      | -1.73        | 17          | 23        | 5         | 13               | 42                |
| LUMO+1      | -2.22        | 8           | 66        | 7         | 13               | 6                 |
| <b>LUMO</b> | <b>-5.14</b> | <b>38</b>   | <b>0</b>  | <b>40</b> | <b>0</b>         | <b>21</b>         |
| <b>HOMO</b> | <b>-6.73</b> | <b>18</b>   | <b>14</b> | <b>61</b> | <b>4</b>         | <b>3</b>          |
| HOMO-1      | -7.31        | 3           | 32        | 64        | 0                | 1                 |
| HOMO-2      | -7.52        | 60          | 8         | 6         | 11               | 14                |
| HOMO-3      | -7.90        | 11          | 7         | 77        | 0                | 4                 |
| HOMO-4      | -7.94        | 50          | 6         | 28        | 10               | 7                 |
| HOMO-5      | -8.35        | 18          | 9         | 70        | 1                | 2                 |

**Table S8.** MO Composition of  $2^{1+}$  in Singlet ( $S=0$ ) Ground State (b3lyp/LanL2DZ(f)[Re]6-31G\*\*[C,H,N,O]).

| MO          | Energy (eV)  | Composition |           |           |                  |                   |
|-------------|--------------|-------------|-----------|-----------|------------------|-------------------|
|             |              | Re          | Pz        | Hpp       | CO (trans to Pz) | CO (trans to Hpp) |
| LUMO+6      | +0.11        | 8           | 5         | 70        | 15               | 2                 |
| LUMO+5      | -0.14        | 11          | 3         | 68        | 0                | 18                |
| LUMO+4      | -0.20        | 1           | 1         | 4         | 25               | 69                |
| LUMO+3      | -0.97        | 25          | 1         | 10        | 19               | 45                |
| LUMO+2      | -1.05        | 26          | 6         | 3         | 26               | 38                |
| LUMO+1      | -1.36        | 0           | 84        | 15        | 0                | 1                 |
| <b>LUMO</b> | <b>-2.35</b> | <b>3</b>    | <b>85</b> | <b>7</b>  | <b>4</b>         | <b>0</b>          |
| <b>HOMO</b> | <b>-6.06</b> | <b>33</b>   | <b>0</b>  | <b>50</b> | <b>1</b>         | <b>16</b>         |
| HOMO-1      | -6.31        | 24          | 9         | 56        | 6                | 5                 |
| HOMO-2      | -6.74        | 62          | 4         | 5         | 12               | 17                |
| HOMO-3      | -6.91        | 1           | 27        | 71        | 0                | 1                 |
| HOMO-4      | -7.13        | 43          | 9         | 30        | 9                | 9                 |
| HOMO-5      | -7.32        | 18          | 14        | 60        | 0                | 8                 |

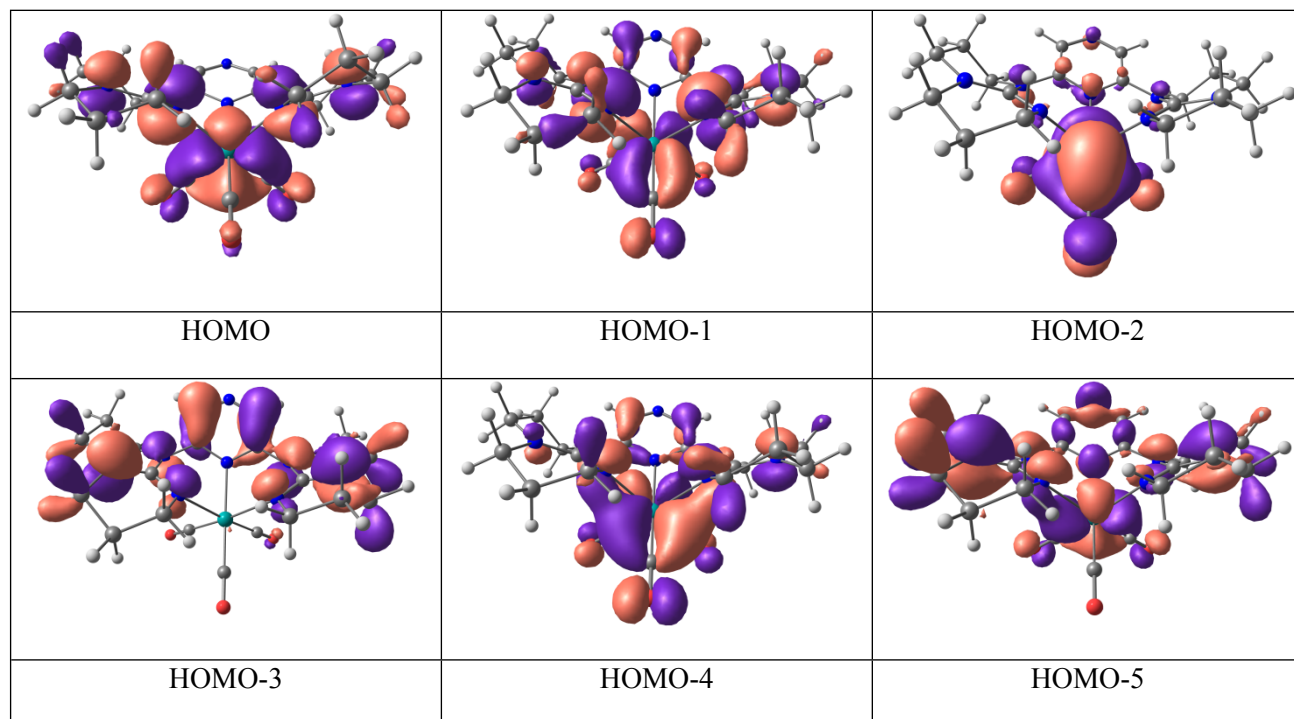

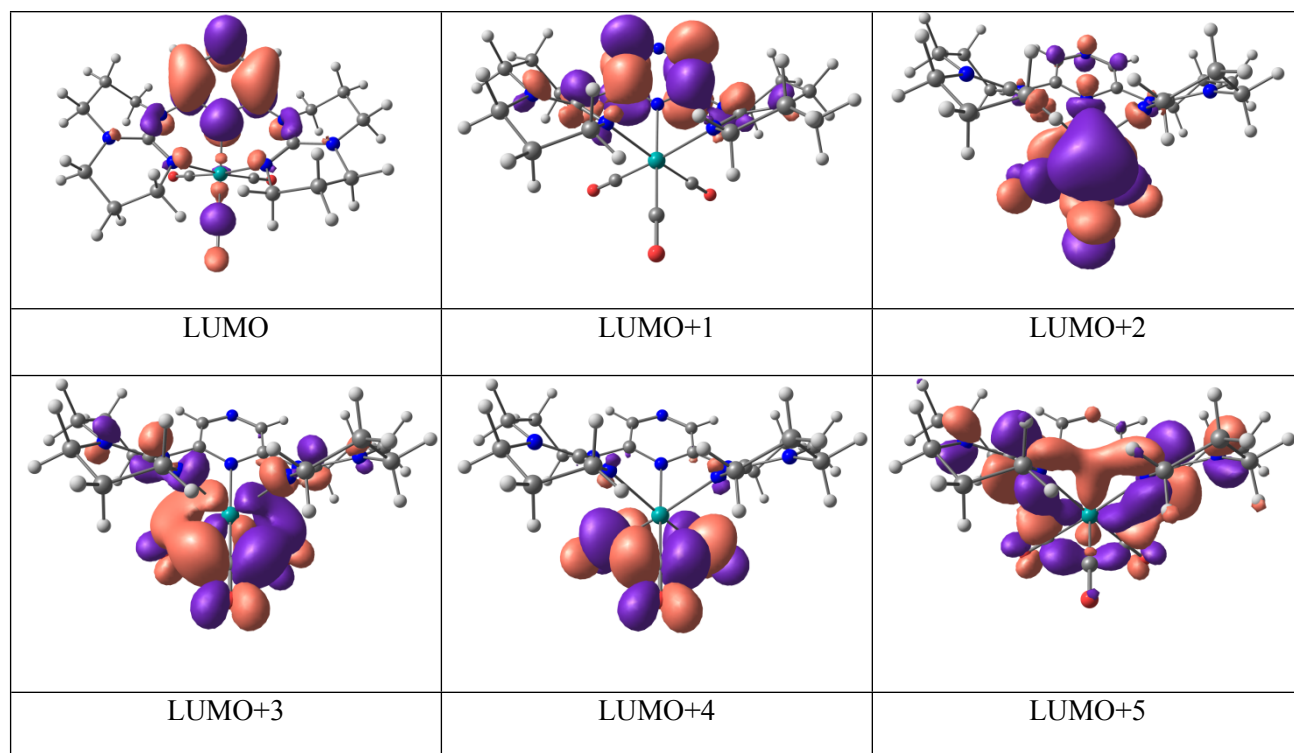

**Figure S7.** Kohn-Sham molecular orbital diagrams of  $2^{1+}$  in ( $S=0$ ) ground state

**Table S9.** Selected Transitions from TD-DFT calculations of  $2^{1+}$  in the Singlet Ground State (b3lyp/LanL2DZ(f)[Re]6-31G\*\*[C,H,N,O], CPCM (CH<sub>3</sub>CN)).

| energy (eV) | $\lambda/\text{nm}$ | $\lambda/\text{nm}$ ( $\epsilon \times 10^3 \text{ M}^{-1} \text{ cm}^{-1}$ ) [expt.] | f      | Major transition(s)                                       | character                                                                                       |
|-------------|---------------------|---------------------------------------------------------------------------------------|--------|-----------------------------------------------------------|-------------------------------------------------------------------------------------------------|
| 5.42        | 228                 | 219 (44.5)                                                                            | 0.1714 | H $\rightarrow$ L+6 (49%)                                 | hpp(n/ $\pi$ ) (major) + Re(d $\pi$ ) (minor) to hpp( $\pi^*$ )                                 |
| 4.41        | 281                 | 283 (12.4)                                                                            | 0.0972 | H-1 $\rightarrow$ L+2 (51%),<br>H $\rightarrow$ L+3 (27%) | hpp(n/ $\pi$ ) (major) + Re(d $\pi$ ) (minor) to CO( $\pi^*$ ) (major) + Re(d $\pi^*$ ) (minor) |
| 3.90        | 318                 | 318 (7.3)                                                                             | 0.0773 | H-3 $\rightarrow$ L (87%)                                 | hpp(n/ $\pi$ ) (major) + Pz(n/ $\pi$ ) (minor) to Pz( $\pi^*$ )                                 |
| 3.19        | 389                 | 377 (3.4)                                                                             | 0.0238 | H-1 $\rightarrow$ L (96%)                                 | hpp(n/ $\pi$ ) (major) + Re(d $\pi$ ) (minor) to Pz( $\pi^*$ )                                  |



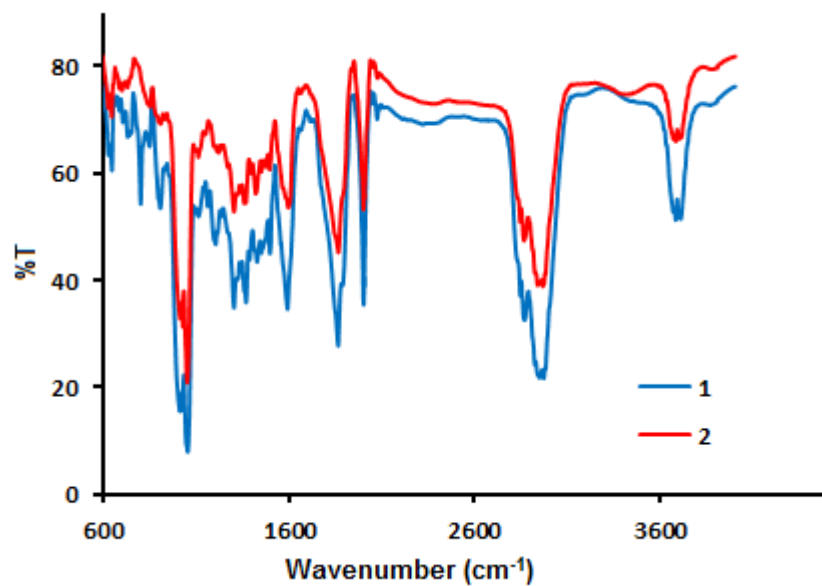

**Figure S8.** ATR-IR spectra of complexes **1** and **2**, recorded at ambient temperature as solids.

**Table S10.** Infrared Frequencies: Observed vs. Calculated

| Compound                                                                                    | Obs. stretching (cm <sup>-1</sup> ) | Calc. stretching (cm <sup>-1</sup> ) | Bond involved |
|---------------------------------------------------------------------------------------------|-------------------------------------|--------------------------------------|---------------|
| <b>1</b>                                                                                    | 2003                                | 2093                                 | C20-O1        |
|                                                                                             | 1885                                | 2000                                 | C22-O3        |
|                                                                                             | 1867                                | 1995                                 | C21-O2        |
| <b>2</b>                                                                                    | 2005                                | 2096                                 | C20-O2        |
|                                                                                             | 1888                                | 2006                                 | C19-O1        |
|                                                                                             | 1868                                | 1999                                 | C21-O3        |
| <i>fac, fac</i> -[Re( <b>bqp</b> - <i>k</i> <sup>3</sup> N)(CO) <sub>3</sub> ] <sup>+</sup> | 2028, 1918                          | -----                                | -----         |

**bqp** = 2,6-bis(8'-quinoliny)pyridine

**Table S11.** Electrochemical data of **L1**, **L2**, **1** and **2** and some benchmark complexes.

| Compound                                                                                                                        | $E_{1/2}(\text{ox})^a$ |               |                            | $E_{1/2}(\text{red})^a$ |                | $\Delta E_{1/2}$ |
|---------------------------------------------------------------------------------------------------------------------------------|------------------------|---------------|----------------------------|-------------------------|----------------|------------------|
|                                                                                                                                 |                        |               |                            |                         |                |                  |
| <b>L1 (dgy)</b>                                                                                                                 | -----                  | 1.11<br>(308) | 0.77<br>(irr) <sup>b</sup> | -----                   | -----          | -----            |
| <b>L2 (dgpz)</b>                                                                                                                | -----                  | 1.14<br>(189) | 0.77<br>(irr)              | -1.99<br>(irr)          | -----          | 2.76             |
| <b>1</b>                                                                                                                        | 1.43<br>(100)          | 1.08<br>(80)  | 0.73<br>(irr) <sup>b</sup> | -1.99<br>(irr)          | -----          | 2.72             |
| <b>2</b>                                                                                                                        | 1.43<br>(80)           | 1.09<br>(82)  | 0.72<br>(irr)              | -1.49<br>(73)           | -----          | 2.22             |
| <i>mer, cis</i> -[Re(tpy- $\kappa^3$ N)(CO) <sub>2</sub> (P(OEt) <sub>3</sub> )](CF <sub>3</sub> SO <sub>3</sub> ) <sup>c</sup> | 1.30<br>(irr)          | 0.93<br>(73)  | -----                      | -1.23                   | -1.5<br>(irr)  | 2.16             |
| <i>mer, cis</i> -[Re(tpy- $\kappa^3$ N)(CO) <sub>2</sub> Cl] <sup>c</sup>                                                       | 1.22<br>(irr)          | -----         | 0.48<br>(65)               | -1.17<br>(irr)          | -1.34<br>(irr) | 1.65             |
| [Re(bpy)(CO) <sub>3</sub> (Py)](ClO <sub>4</sub> ) <sup>d</sup>                                                                 | 1.74                   | -----         | -----                      | -1.09                   | -1.39          | 2.83             |

<sup>a</sup>Potentials are in volts vs. SCE in acetonitrile solutions, 0.1 M in [*n*-Bu<sub>4</sub>N]PF<sub>6</sub>, recorded at 25 ± 1 °C at a sweep rate as mentioned in experimental section. The difference between cathodic and anodic peak potentials (millivolts) is given in parentheses. <sup>b</sup>Irreversible; potential is given for the anodic wave. <sup>c</sup>From ref 5. <sup>d</sup>From ref 6.

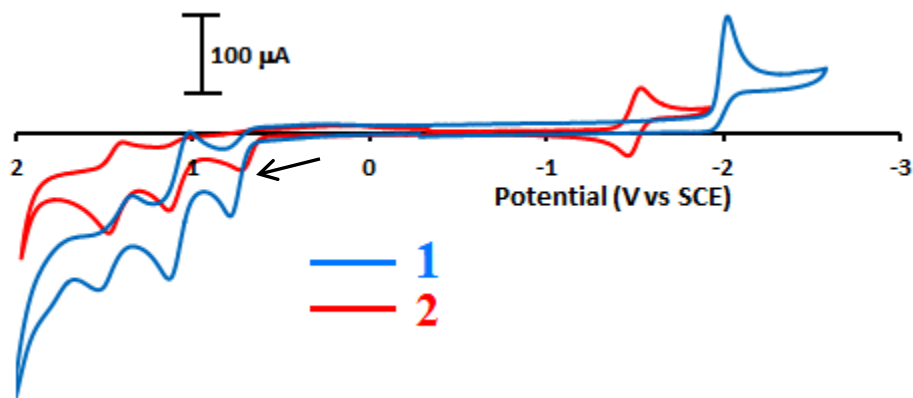

**Figure S9.** Cyclic voltammogram of complexes **1** and **2** in dry, degassed CH<sub>3</sub>CN, recorded at a scan rate of 10 and 25 mV/s, respectively.

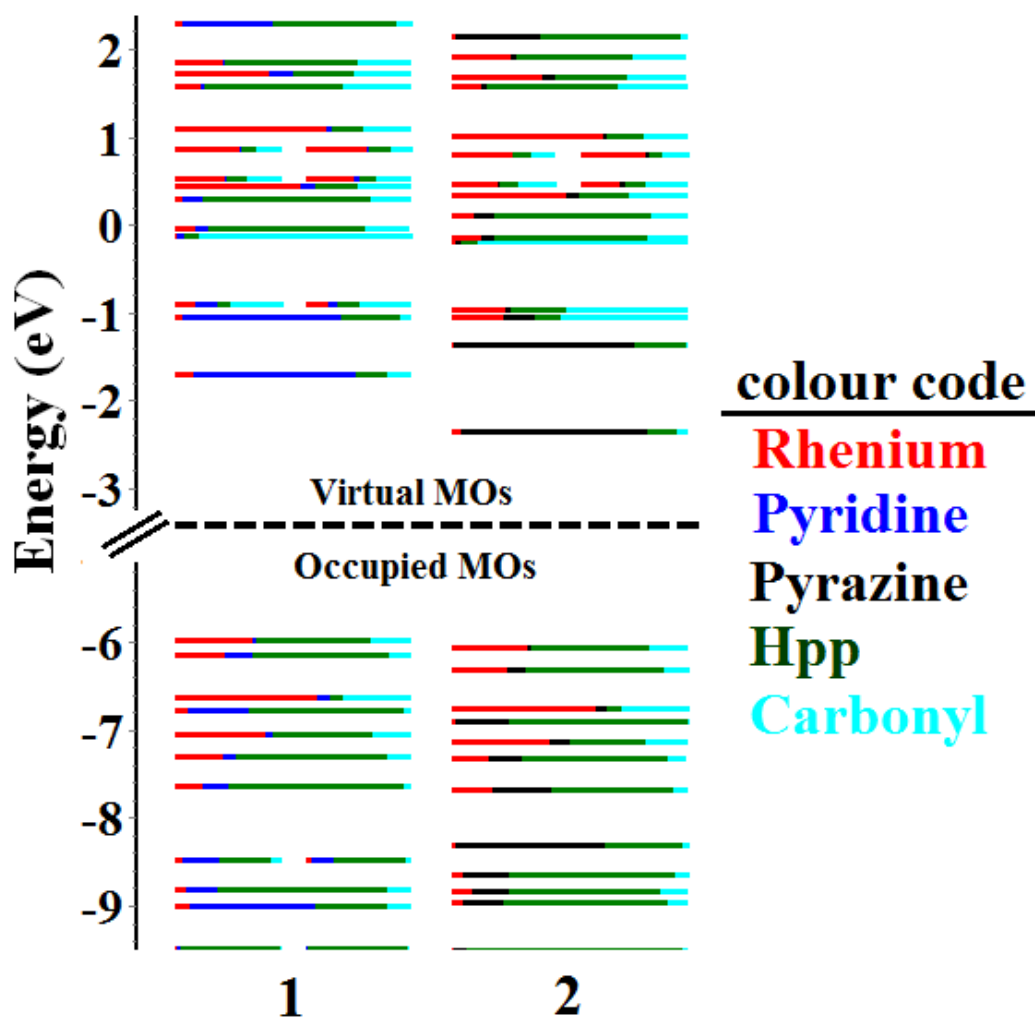

**Figure S10.** Calculated frontier MO energies of the modeled complexes, **1** and **2** obtained from DFT(b3lyp/LanL2DZ(f)[Re]6-31G\*\*[CHNO] with CPCM(CH<sub>3</sub>CN) and 0.05 eV of threshold of degeneracy.

**Table S12.** Optimized Atomic coordinates obtained from DFT calculations of **1<sup>+</sup>**

| Center<br>Number | Atomic<br>Number | Atomic<br>Type | Coordinates (Angstroms) |           |           |
|------------------|------------------|----------------|-------------------------|-----------|-----------|
|                  |                  |                | X                       | Y         | Z         |
| 1                | 75               | 0              | -0.000045               | -0.766037 | 0.748959  |
| 2                | 8                | 0              | 2.188434                | -0.566095 | 2.920411  |
| 3                | 8                | 0              | -0.000405               | -3.842376 | 1.013527  |
| 4                | 8                | 0              | -2.188380               | -0.565700 | 2.920517  |
| 5                | 7                | 0              | 0.000051                | 1.378688  | 0.203710  |
| 6                | 7                | 0              | -2.372700               | 1.310015  | 0.106480  |
| 7                | 7                | 0              | -3.808899               | 0.007507  | -1.228912 |
| 8                | 7                | 0              | -1.583576               | -0.689864 | -0.835788 |
| 9                | 7                | 0              | 2.372806                | 1.309799  | 0.106686  |
| 10               | 7                | 0              | 3.808871                | 0.007474  | -1.229120 |
| 11               | 7                | 0              | 1.583642                | -0.690019 | -0.835651 |
| 12               | 6                | 0              | 1.171421                | 2.044684  | 0.047251  |
| 13               | 6                | 0              | 1.200860                | 3.433053  | -0.125057 |
| 14               | 1                | 0              | 2.138792                | 3.956448  | -0.246695 |
| 15               | 6                | 0              | 0.000183                | 4.127549  | -0.182576 |
| 16               | 1                | 0              | 0.000237                | 5.202897  | -0.328043 |
| 17               | 6                | 0              | -1.200557               | 3.433156  | -0.125164 |
| 18               | 1                | 0              | -2.138440               | 3.956621  | -0.246890 |
| 19               | 6                | 0              | -1.171247               | 2.044787  | 0.047151  |
| 20               | 6                | 0              | -3.591981               | 1.971280  | 0.607391  |
| 21               | 1                | 0              | -3.297707               | 2.833920  | 1.203264  |
| 22               | 1                | 0              | -4.096619               | 1.273049  | 1.284454  |
| 23               | 6                | 0              | -4.488526               | 2.329014  | -0.571917 |
| 24               | 1                | 0              | -5.393873               | 2.848361  | -0.245068 |
| 25               | 1                | 0              | -3.954986               | 2.995714  | -1.257380 |
| 26               | 6                | 0              | -4.873024               | 1.026997  | -1.267912 |
| 27               | 1                | 0              | -5.749651               | 0.590708  | -0.772516 |
| 28               | 1                | 0              | -5.150706               | 1.200721  | -2.314950 |
| 29               | 6                | 0              | -4.227442               | -1.272753 | -1.831391 |
| 30               | 1                | 0              | -4.375594               | -1.109589 | -2.906950 |
| 31               | 1                | 0              | -5.201968               | -1.541089 | -1.406793 |
| 32               | 6                | 0              | -3.204339               | -2.372643 | -1.591533 |
| 33               | 1                | 0              | -3.389998               | -3.202162 | -2.279635 |
| 34               | 1                | 0              | -3.285597               | -2.762794 | -0.571586 |
| 35               | 6                | 0              | -1.811660               | -1.782734 | -1.792001 |
| 36               | 1                | 0              | -1.046174               | -2.540535 | -1.635537 |
| 37               | 1                | 0              | -1.698420               | -1.410460 | -2.820329 |
| 38               | 6                | 0              | -2.568090               | 0.164973  | -0.688246 |
| 39               | 6                | 0              | 3.592088                | 1.971028  | 0.607646  |
| 40               | 1                | 0              | 4.096694                | 1.272771  | 1.284707  |
| 41               | 1                | 0              | 3.297812                | 2.833651  | 1.203542  |
| 42               | 6                | 0              | 4.488673                | 2.328752  | -0.571634 |
| 43               | 1                | 0              | 5.393977                | 2.848187  | -0.244803 |
| 44               | 1                | 0              | 3.955112                | 2.995330  | -1.257202 |
| 45               | 6                | 0              | 4.873277                | 1.026692  | -1.267428 |
| 46               | 1                | 0              | 5.151630                | 1.200360  | -2.314293 |
| 47               | 1                | 0              | 5.749511                | 0.590202  | -0.771496 |
| 48               | 6                | 0              | 4.227259                | -1.272631 | -1.832038 |

|    |   |   |           |           |           |
|----|---|---|-----------|-----------|-----------|
| 49 | 1 | 0 | 5.201968  | -1.540993 | -1.407879 |
| 50 | 1 | 0 | 4.374980  | -1.109234 | -2.907619 |
| 51 | 6 | 0 | 3.204332  | -2.372635 | -1.591994 |
| 52 | 1 | 0 | 3.285958  | -2.762904 | -0.572121 |
| 53 | 1 | 0 | 3.389842  | -3.202050 | -2.280261 |
| 54 | 6 | 0 | 1.811532  | -1.782848 | -1.791953 |
| 55 | 1 | 0 | 1.697871  | -1.410583 | -2.820239 |
| 56 | 1 | 0 | 1.046192  | -2.540742 | -1.635217 |
| 57 | 6 | 0 | 2.568162  | 0.164819  | -0.688171 |
| 58 | 6 | 0 | 1.363340  | -0.652279 | 2.105257  |
| 59 | 6 | 0 | -0.000239 | -2.682021 | 0.940370  |
| 60 | 6 | 0 | -1.363364 | -0.652046 | 2.105299  |

**Table S13.** Optimized Atomic coordinates obtained from DFT calculations of  $2^{+}$

| Center<br>Number | Atomic<br>Number | Atomic<br>Type | Coordinates (Angstroms) |           |           |
|------------------|------------------|----------------|-------------------------|-----------|-----------|
|                  |                  |                | X                       | Y         | Z         |
| 1                | 75               | 0              | 0.013673                | -0.781041 | 0.765764  |
| 2                | 8                | 0              | 2.208585                | -0.519033 | 2.924365  |
| 3                | 8                | 0              | 0.096155                | -3.857669 | 1.046418  |
| 4                | 8                | 0              | -2.171290               | -0.642276 | 2.945522  |
| 5                | 7                | 0              | -0.046399               | 1.346319  | 0.218823  |
| 6                | 7                | 0              | -0.144445               | 4.082819  | -0.260951 |
| 7                | 7                | 0              | -2.417824               | 1.237299  | 0.161365  |
| 8                | 7                | 0              | -3.847517               | -0.079514 | -1.170717 |
| 9                | 7                | 0              | -1.605078               | -0.741036 | -0.797316 |
| 10               | 7                | 0              | 2.325374                | 1.390874  | 0.073640  |
| 11               | 7                | 0              | 3.821388                | 0.088320  | -1.189715 |
| 12               | 7                | 0              | 1.613223                | -0.669826 | -0.808140 |
| 13               | 6                | 0              | 1.090000                | 2.052573  | 0.016700  |
| 14               | 6                | 0              | 1.016599                | 3.437656  | -0.206297 |
| 15               | 1                | 0              | 1.911068                | 4.029168  | -0.365182 |
| 16               | 6                | 0              | -1.259096               | 3.367299  | -0.147574 |
| 17               | 1                | 0              | -2.197402               | 3.900145  | -0.255242 |
| 18               | 6                | 0              | -1.233113               | 1.980606  | 0.068206  |
| 19               | 6                | 0              | -3.624040               | 1.867339  | 0.734740  |
| 20               | 1                | 0              | -3.318771               | 2.759290  | 1.280660  |
| 21               | 1                | 0              | -4.045558               | 1.172361  | 1.470187  |
| 22               | 6                | 0              | -4.623193               | 2.160088  | -0.375805 |
| 23               | 1                | 0              | -4.180180               | 2.845793  | -1.105987 |
| 24               | 1                | 0              | -5.526276               | 2.634742  | 0.018213  |
| 25               | 6                | 0              | -4.993555               | 0.836615  | -1.034718 |
| 26               | 1                | 0              | -5.758484               | 0.324627  | -0.435609 |
| 27               | 1                | 0              | -5.419224               | 1.001961  | -2.030683 |
| 28               | 6                | 0              | -4.135024               | -1.350955 | -1.851121 |
| 29               | 1                | 0              | -5.019820               | -1.200018 | -2.473637 |
| 30               | 1                | 0              | -4.375362               | -2.127471 | -1.112258 |
| 31               | 6                | 0              | -2.925807               | -1.743631 | -2.688464 |
| 32               | 1                | 0              | -3.095007               | -2.702359 | -3.187105 |

|    |   |   |           |           |           |
|----|---|---|-----------|-----------|-----------|
| 33 | 1 | 0 | -2.767451 | -0.989075 | -3.466964 |
| 34 | 6 | 0 | -1.711602 | -1.842393 | -1.769686 |
| 35 | 1 | 0 | -1.745336 | -2.784636 | -1.209270 |
| 36 | 1 | 0 | -0.793484 | -1.857611 | -2.362819 |
| 37 | 6 | 0 | -2.607203 | 0.090178  | -0.636864 |
| 38 | 6 | 0 | 3.512283  | 2.134285  | 0.541743  |
| 39 | 1 | 0 | 4.045725  | 1.497041  | 1.255900  |
| 40 | 1 | 0 | 3.175792  | 3.013269  | 1.089441  |
| 41 | 6 | 0 | 4.392846  | 2.469258  | -0.655082 |
| 42 | 1 | 0 | 5.270596  | 3.049368  | -0.356832 |
| 43 | 1 | 0 | 3.828712  | 3.070944  | -1.375418 |
| 44 | 6 | 0 | 4.841876  | 1.149961  | -1.275313 |
| 45 | 1 | 0 | 5.121886  | 1.278010  | -2.328100 |
| 46 | 1 | 0 | 5.730644  | 0.780119  | -0.748951 |
| 47 | 6 | 0 | 4.301609  | -1.204010 | -1.717617 |
| 48 | 1 | 0 | 5.272605  | -1.415143 | -1.254489 |
| 49 | 1 | 0 | 4.473726  | -1.086845 | -2.795376 |
| 50 | 6 | 0 | 3.310660  | -2.326668 | -1.451067 |
| 51 | 1 | 0 | 3.378611  | -2.667821 | -0.412792 |
| 52 | 1 | 0 | 3.540598  | -3.179620 | -2.095691 |
| 53 | 6 | 0 | 1.905176  | -1.793574 | -1.712645 |
| 54 | 1 | 0 | 1.812506  | -1.465950 | -2.758315 |
| 55 | 1 | 0 | 1.160502  | -2.569919 | -1.545686 |
| 56 | 6 | 0 | 2.568128  | 0.222340  | -0.675118 |
| 57 | 6 | 0 | 1.381640  | -0.630186 | 2.115261  |
| 58 | 6 | 0 | 0.063254  | -2.699652 | 0.962882  |
| 59 | 6 | 0 | -1.348895 | -0.705005 | 2.126232  |

-----

**Table S14.** Optimized Atomic coordinates obtained from DFT calculations of  $\mathbf{1}^{2+}$

| Center<br>Number | Atomic<br>Number | Atomic<br>Type | Coordinates (Angstroms) |           |           |
|------------------|------------------|----------------|-------------------------|-----------|-----------|
|                  |                  |                | X                       | Y         | Z         |
| 1                | 75               | 0              | 0.000040                | -0.752473 | 0.611551  |
| 2                | 8                | 0              | 2.125759                | -0.644050 | 2.922570  |
| 3                | 8                | 0              | 0.000862                | -3.849575 | 0.733280  |
| 4                | 8                | 0              | -2.126213               | -0.647389 | 2.922326  |
| 5                | 7                | 0              | -0.000065               | 1.402992  | 0.172189  |
| 6                | 7                | 0              | -2.382587               | 1.352153  | 0.134703  |
| 7                | 7                | 0              | -3.879488               | -0.015253 | -1.048082 |
| 8                | 7                | 0              | -1.629965               | -0.687304 | -0.777073 |
| 9                | 7                | 0              | 2.382509                | 1.352464  | 0.134198  |
| 10               | 7                | 0              | 3.879493                | -0.015420 | -1.047867 |
| 11               | 7                | 0              | 1.629936                | -0.687329 | -0.776938 |
| 12               | 6                | 0              | 1.169860                | 2.069616  | -0.005655 |
| 13               | 6                | 0              | 1.199125                | 3.439677  | -0.274172 |
| 14               | 1                | 0              | 2.138323                | 3.953878  | -0.423977 |
| 15               | 6                | 0              | -0.000266               | 4.129789  | -0.389954 |

|    |   |   |           |           |           |
|----|---|---|-----------|-----------|-----------|
| 16 | 1 | 0 | -0.000343 | 5.191035  | -0.615832 |
| 17 | 6 | 0 | -1.199561 | 3.439592  | -0.273742 |
| 18 | 1 | 0 | -2.138851 | 3.953730  | -0.423178 |
| 19 | 6 | 0 | -1.170106 | 2.069508  | -0.005333 |
| 20 | 6 | 0 | -3.572506 | 2.062675  | 0.665937  |
| 21 | 1 | 0 | -3.234938 | 2.962662  | 1.176283  |
| 22 | 1 | 0 | -4.032459 | 1.418096  | 1.423172  |
| 23 | 6 | 0 | -4.543614 | 2.337788  | -0.473670 |
| 24 | 1 | 0 | -5.427083 | 2.875611  | -0.119651 |
| 25 | 1 | 0 | -4.066457 | 2.957349  | -1.239813 |
| 26 | 6 | 0 | -4.969381 | 0.992501  | -1.046210 |
| 27 | 1 | 0 | -5.784132 | 0.567796  | -0.449167 |
| 28 | 1 | 0 | -5.333531 | 1.086192  | -2.074848 |
| 29 | 6 | 0 | -4.328077 | -1.321901 | -1.591383 |
| 30 | 1 | 0 | -4.559870 | -1.169213 | -2.651867 |
| 31 | 1 | 0 | -5.262700 | -1.582368 | -1.084672 |
| 32 | 6 | 0 | -3.276415 | -2.404291 | -1.415561 |
| 33 | 1 | 0 | -3.493088 | -3.236310 | -2.090633 |
| 34 | 1 | 0 | -3.283835 | -2.799462 | -0.394252 |
| 35 | 6 | 0 | -1.915868 | -1.789870 | -1.719639 |
| 36 | 1 | 0 | -1.119436 | -2.527259 | -1.645511 |
| 37 | 1 | 0 | -1.892610 | -1.391549 | -2.743397 |
| 38 | 6 | 0 | -2.628405 | 0.191656  | -0.599519 |
| 39 | 6 | 0 | 3.572396  | 2.063188  | 0.665266  |
| 40 | 1 | 0 | 4.032306  | 1.418875  | 1.422755  |
| 41 | 1 | 0 | 3.234807  | 2.963356  | 1.175265  |
| 42 | 6 | 0 | 4.543536  | 2.337870  | -0.474418 |
| 43 | 1 | 0 | 5.426969  | 2.875886  | -0.120609 |
| 44 | 1 | 0 | 4.066353  | 2.957081  | -1.240830 |
| 45 | 6 | 0 | 4.969377  | 0.992356  | -1.046362 |
| 46 | 1 | 0 | 5.333577  | 1.085605  | -2.075022 |
| 47 | 1 | 0 | 5.784100  | 0.567920  | -0.449091 |
| 48 | 6 | 0 | 4.328240  | -1.322404 | -1.590281 |
| 49 | 1 | 0 | 5.262447  | -1.582819 | -1.082772 |
| 50 | 1 | 0 | 4.560849  | -1.170156 | -2.650646 |
| 51 | 6 | 0 | 3.276262  | -2.404567 | -1.414834 |
| 52 | 1 | 0 | 3.283151  | -2.799695 | -0.393505 |
| 53 | 1 | 0 | 3.493033  | -3.236673 | -2.089767 |
| 54 | 6 | 0 | 1.915980  | -1.789847 | -1.719511 |
| 55 | 1 | 0 | 1.893333  | -1.391358 | -2.743219 |
| 56 | 1 | 0 | 1.119325  | -2.527037 | -1.645887 |
| 57 | 6 | 0 | 2.628388  | 0.191740  | -0.599524 |
| 58 | 6 | 0 | 1.359842  | -0.690854 | 2.069056  |
| 59 | 6 | 0 | 0.000508  | -2.697175 | 0.707369  |
| 60 | 6 | 0 | -1.360037 | -0.692673 | 2.068973  |

---

## References:

1. (a) S. P. Schmidt, W. C. Trogler, F. Basolo, *Inorg. Syn.*, 1990, **28**, 154; (b) A. K. Pal, N. Zaccheroni, S. Campagna, G. S. Hanan, *Chem. Commun.*, 2014, accepted for publication.
2. *APEX2 (2007) version 2.4-0; Bruker Molecular Analysis Research Tool*. Bruker AXS Inc., Madison, WI 53719-1173.
3. Sheldrick, G. M. (1996). *SADABS*, Bruker Area Detector Absorption Corrections. Bruker AXS Inc., Madison, WI 53719-1173.
4. *SHELXTL (2001) version 6.12*; Bruker Analytical X-ray Systems Inc., Madison, WI 53719-1173.
5. (a) Losey, D. J.; Frenzel, B. A.; Smith, W. M.; Hightower, S. E.; Hamaker, C. G. *Inorg. Chem. Commun.* **2013**, *30*, 46. (b) Frenzel, B. A.; Schumaker, J. E.; Black, D. R.; Hightower, S. E. *Dalton Trans.* **2013**, *42*, 12440.
6. L. A. Sacksteder, A. P. Zipp, E. A. Brown, J. Streich, J. N. Demas, B. A. DeGraff, *Inorg. Chem.*, 1990, **29**, 4335.
7. M. J. Frisch, G. W. Trucks, H. B. Schlegel, G. E. Scuseria, M. A. Robb, J. R. Cheeseman, J. A. Montgomery, T. J. Vreven, K. N. Kudin, J. C. Burant, J. M. S. Millam, J. Tomasi, V. Barone, B. Mennucci, M. Cossi, G. Scalmani, N. Rega, G. A. Petersson, H. Nakatsuji, M. Hada, M. Ehara, K. Toyota, R. Fukuda, J. Hasegawa, M. Ishida, T. Nakajima, Y. Honda, O. Kitao, H. Nakai, M. Klene, X. Li, J. E. Knox, H. P. Hratchian, J. B. Cross, C. Adamo, J. Jaramillo, R. Gomperts, R. E. Startmann, O. Yazyev, A. J. Austin, R. Cammi, C. Pomelli, J. W. Ochterski, P. Y. Ayala, K. Morokuma, G. A. Voth, P. Salvador, J. J. Dannenberg, V. G. Zakrzewski, J. M. Dapprich, A. D. Daniels, M. C. Strain, O. Farkas, D. K. Malick, A. D. Rabuck, K. Raghavachari, J. B. Foresman, J. V. Ortiz, Q. Cui, A. G. Baboul, S. Clifford, J. B. Cioslowski, G. Liu, A. Liashenko, I. Piskorz, L. M. R. Komaromi, D. J. Fox, T. Keith, M. A. Al-Laham, C. Y. Peng, A. Manayakkara, M. Challacombe, P. M. W. Gill, B. G. Johnson, W. Chen, M. W. Wong, C. Gonzalez, J. A. Pople, *Gaussian 2003, Revision C.02*; Gaussian Inc.:Pittsburgh PA, 2003.



8. A. D. Becke, *J. Chem. Phys.*, 1993, **98**, 5648.
9. C. Lee, W. Yang, R. G. Parr, *Phys. Rev. B: Condens. Matter*, 1988, **37**, 785.
10. A. D. McLean, G. S. Chandler, *J. Chem. Phys.*, 1980, **72**, 5639.
11. P. J. Hay, W. R. Wadt, *J. Chem. Phys.*, 1985, **82**, 270.
12. (a) M. E. Casida, C. Jamorski, K. C. Casida, D. R. Salahub, *J. Chem. Phys.*, 1998, **108**, 4439; (b) R. E. Stratmann, G. E. Scuseria, M. J. Frisch, *J. Chem. Phys.*, 1998, **109**, 8218.
13. (a) M. Cossi, N. Rega, G. Scalmani, V. Barone, *J. Comput. Chem.*, 2003, **24**, 669; (b) M. Cossi, V. Barone, *J. Chem. Phys.*, 2001, **115**, 4708; (c) V. Barone, M. Cossi, *J. Phys. Chem. A*, 1998, **102**, 1995.
14. W. R. Browne, N. M. O'Boyle, J. J. McGarvey, J. G. Vos, *Chem. Soc. Rev.*, 2005, **34**, 641.
15. D. A. Zhurko, G. A. Zhurko, *ChemCraft 1.5*; Plimus: San Diego, CA. Available at <http://www.chemcraftprog.com>.
